# Supplementary material for: Tissue and imaging biomarkers for hypoxia predict poor outcome in endometrial cancer
Source: PubMed Central journal article supplement (PMC5342519; doi:10.18632/oncotarget.12004), 2016-09-13
Supplement: oncotarget-07-69844-s001.pdf [file oncotarget-07-69844-s001.pdf]

## Tissue and imaging biomarkers for hypoxia predict poor outcome in endometrial cancer

### Supplementary Materials

**Supplementary Table S1: Evaluation of HIF-1 $\alpha$  expression using tissue micro arrays shows a significant overlap with evaluation of full sections**

| TMA                             | Full sections                 |                   |                            |                   | <i>P</i> |
|---------------------------------|-------------------------------|-------------------|----------------------------|-------------------|----------|
|                                 | Epithelial HIF-1 $\alpha$ (%) |                   | Stromal HIF-1 $\alpha$ (%) |                   |          |
|                                 | Low ( <i>n</i> )              | High ( <i>n</i> ) | Low ( <i>n</i> )           | High ( <i>n</i> ) |          |
| Epithelial HIF-1 $\alpha$ : Low | 88 (14)                       | 12 (2)            |                            |                   | 0.04     |
| High                            | 46 (6)*                       | 54 (7)            |                            |                   |          |
| Stromal HIF-1 $\alpha$ Low      |                               |                   | 77 (10)                    | 23 (3)            | 0.003    |
| High                            |                               |                   | 19 (3)                     | 81 (13)           |          |

\*Two cases showed heterogeneous expression pattern. Full sections from 29 patients stained for HIF-1 $\alpha$ .

**Supplementary Table S2: Gene Ontology (GO) annotated gene sets supplied by the Broad Institute (MSigDB).**

| Rank | Gene set                      | <i>P</i> | FDR (%) |
|------|-------------------------------|----------|---------|
| 1    | M_PHASE                       | 0.0      | 0.0     |
| 2    | DEFENSE_RESPONSE              | 0.0      | 0.0     |
| 3    | M_PHASE_OF_MITOTIC_CELL_CYCLE | 0.0      | 0.0     |
| 4    | MITOSIS                       | 0.0      | 0.0     |
| 5    | CELL_CYCLE_PHASE              | 0.0      | 0.0     |
| 6    | CELL_CYCLE_PROCESS            | 0.0      | 0.0     |
| 7    | INFLAMMATORY_RESPONSE         | 0.0      | 0.0     |
| 8    | RESPONSE_TO_OTHER_ORGANISM    | 0.0      | 0.0     |
| 9    | IMMUNE_SYSTEM_PROCESS         | 0.0      | 0.0     |
| 10   | MITOTIC_CELL_CYCLE            | 0.0      | 0.0     |

Top ranked gene sets enriched in endometrial (malignant and premalignant) lesions with high expression of stromal HIF-1 $\alpha$  compared to low stromal protein expression.

**Supplementary Table S3: Top ranked therapeutic agents anti-correlated to lesions expressing high hypoxia signature score versus low hypoxia signature score using Connectivity Map (version 2)**

| Rank | Compound              | <i>N</i> | Enrichment | <i>P</i> | Description     |
|------|-----------------------|----------|------------|----------|-----------------|
| 1    | LY-294002             | 61       | -0,356     | 0        | PI3K inhibitor  |
| 2    | Trichostatin A        | 182      | -0,22      | 0        | HDAC inhibitor  |
| 3    | Tanespimycin (17-AAG) | 62       | -0,27      | 0,0002   | HSP90 inhibitor |

**Supplementary Table S4: Methods applied for immunohistochemical staining**

| Primary antibody | Secondary antibody | Vendor                               | Buffer <sup>d</sup> | Incubation time | Incubation temperature | Dilution   |       |
|------------------|--------------------|--------------------------------------|---------------------|-----------------|------------------------|------------|-------|
| ER $\alpha$      | MM <sup>a</sup>    | Anti-mouse HRP (K4001)               | Dako (M7047)        | pH 9            | 30 min                 | Room temp. | 1:50  |
| PR               | MM <sup>a</sup>    | Anti-mouse HRP (K4001)               | Dako (M3569)        | pH 9            | 60 min                 | Room temp. | 1:150 |
| HIF-1 $\alpha$   | MR <sup>b</sup>    | Anti-rabbit HRP (K4002) <sup>c</sup> | Abcam (ab51608)     | pH 9            | 60 min                 | Room temp. | 1:200 |
| CD45             | MM <sup>a</sup>    | Anti-mouse HRP (K4001)               | Dako (M0701)        | pH 9            | 60 min                 | Room temp. | 1:200 |

<sup>a</sup>Monoclonal mouse, <sup>b</sup>Monoclonal rabbit, <sup>c</sup>When stained together with CD45 anti-Rabbit AP was used (Southern Biotech, 4050-04), <sup>d</sup>Target Retrieval Solution, pH9 (Dako, S2367).

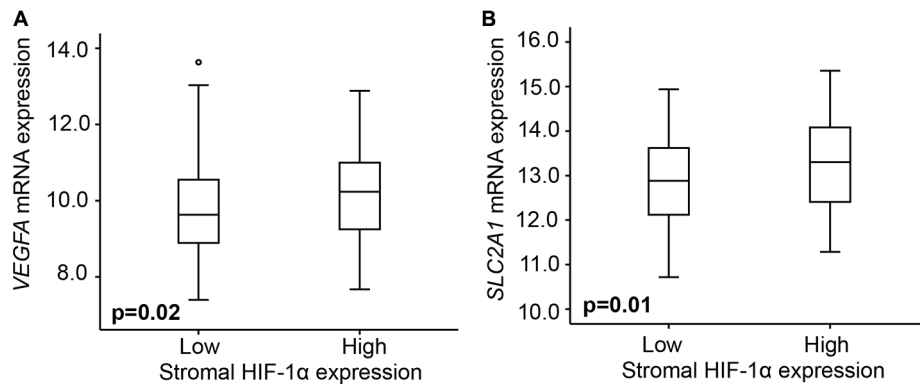

**Supplementary Figure S1: Gene expression according to stromal HIF-1 $\alpha$  protein expression.** Gene expression value of *VEGFA* (A) and *SLC2A1* (B) in primary endometrial cancer (EC) lesions and complex atypical hyperplasia (CAH) according to high and low stromal HIF-1 $\alpha$  protein expression.

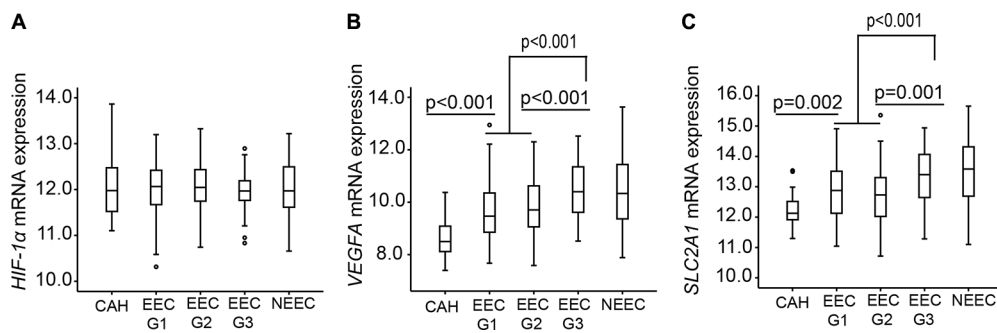

**Supplementary Figure S2: Gene expression according to histological type and grade.** Gene expressions value of *HIF-1 $\alpha$*  (A), *VEGFA* (B) and *SLC2A1* (C) in complex atypical hyperplasia (CAH) patients, endometrioid endometrial cancer (EEC) grade 1, 2 and 3, and non-endometrioid endometrial cancer (NEEC).
